# Supplementary material
Source: MDPI journal article supplement (https://www.mdpi.com/2073-4395/11/1/16)
Supplement: s1 [file s1]

**Table S1.** Air temperature and rainfall in May, June and July of 2016, 2017 and 2018 in two experimental locations.

| Month | Cerekwica     |          | Radzików      |          |
|-------|---------------|----------|---------------|----------|
|       | Rainfall (mm) | Temp. °C | Rainfall (mm) | Temp. °C |
| 2016  |               |          |               |          |
| May   | 32.2          | 21.0     | 31.6          | 16.0     |
| June  | 49.4          | 24.0     | 54.6          | 19.5     |
| July  | 130.0         | 23.5     | 89.8          | 19.8     |
| 2017  |               |          |               |          |
| May   | 52.8          | 13.6     | 57.0          | 14.6     |
| June  | 53.4          | 17.4     | 126.6         | 18.4     |
| July  | 168.0         | 17.8     | 70.0          | 18.9     |
| 2018  |               |          |               |          |
| May   | 16.6          | 17.9     | 73.2          | 17.9     |
| June  | 22.8          | 19.4     | 25.2          | 19.3     |
| July  | 81.3          | 20.8     | 80.0          | 22.1     |
